# Supplementary material
Source: PubMed Central journal article supplement (PMC10919329)

---

Supplementary information

---

# DNA-PKcs has KU-dependent function in rRNA processing and haematopoiesis

---

In the format provided by the authors and unedited

Zhengping Shao, Ryan A. Flynn, Jennifer L. Crowe, Yimeng Zhu, Jialiang Liang, Wenxia Jiang, Fardin Aryan, Patrick Aoude, Carolyn R. Bertozzi, Verna M. Estes, Brian J. Lee, Govind Bhagat, Shan Zha<sup>✉</sup> & Eliezer Calo<sup>✉</sup>

# Northern Blots

Fig. 3c

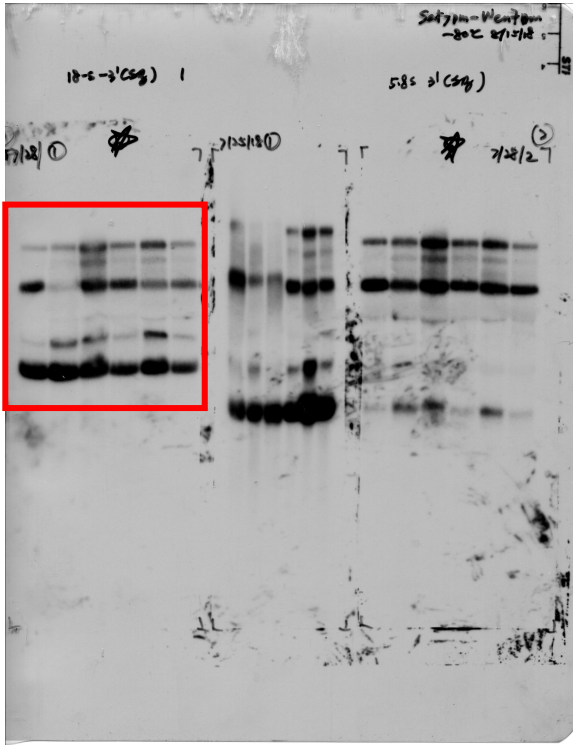

Fig. 3d

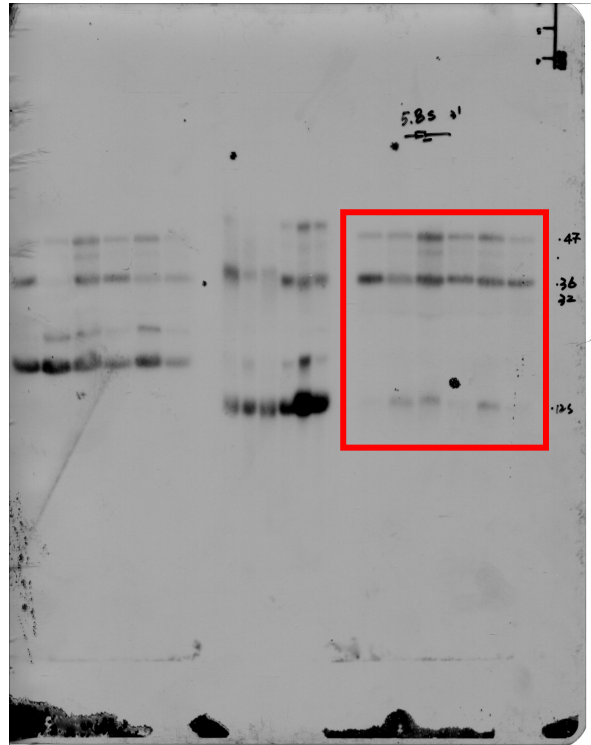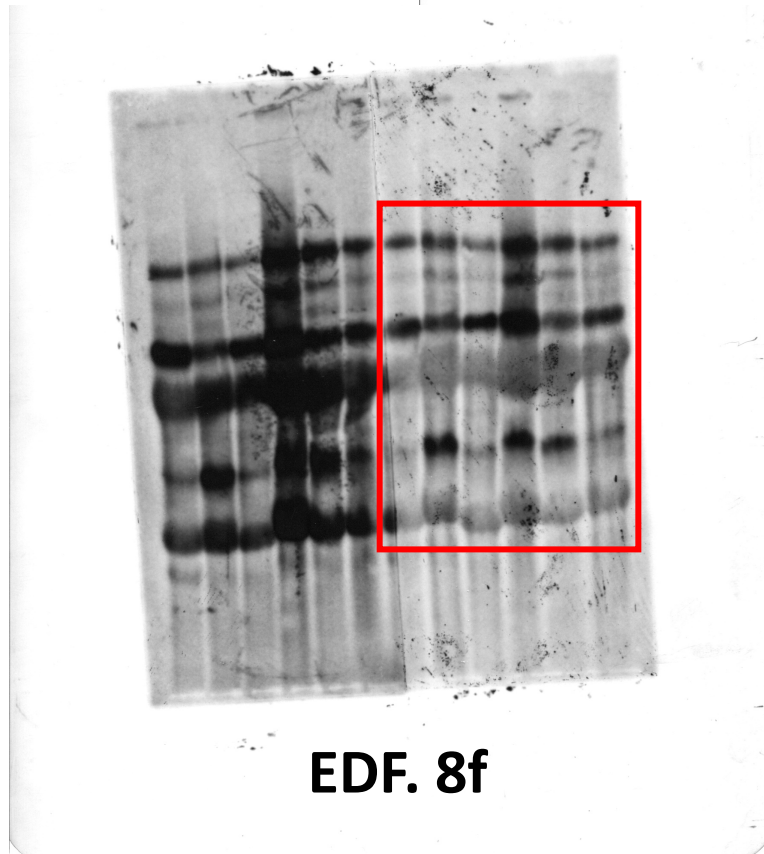

EDF. 8f

# Southern Blots

EDF.2d upper

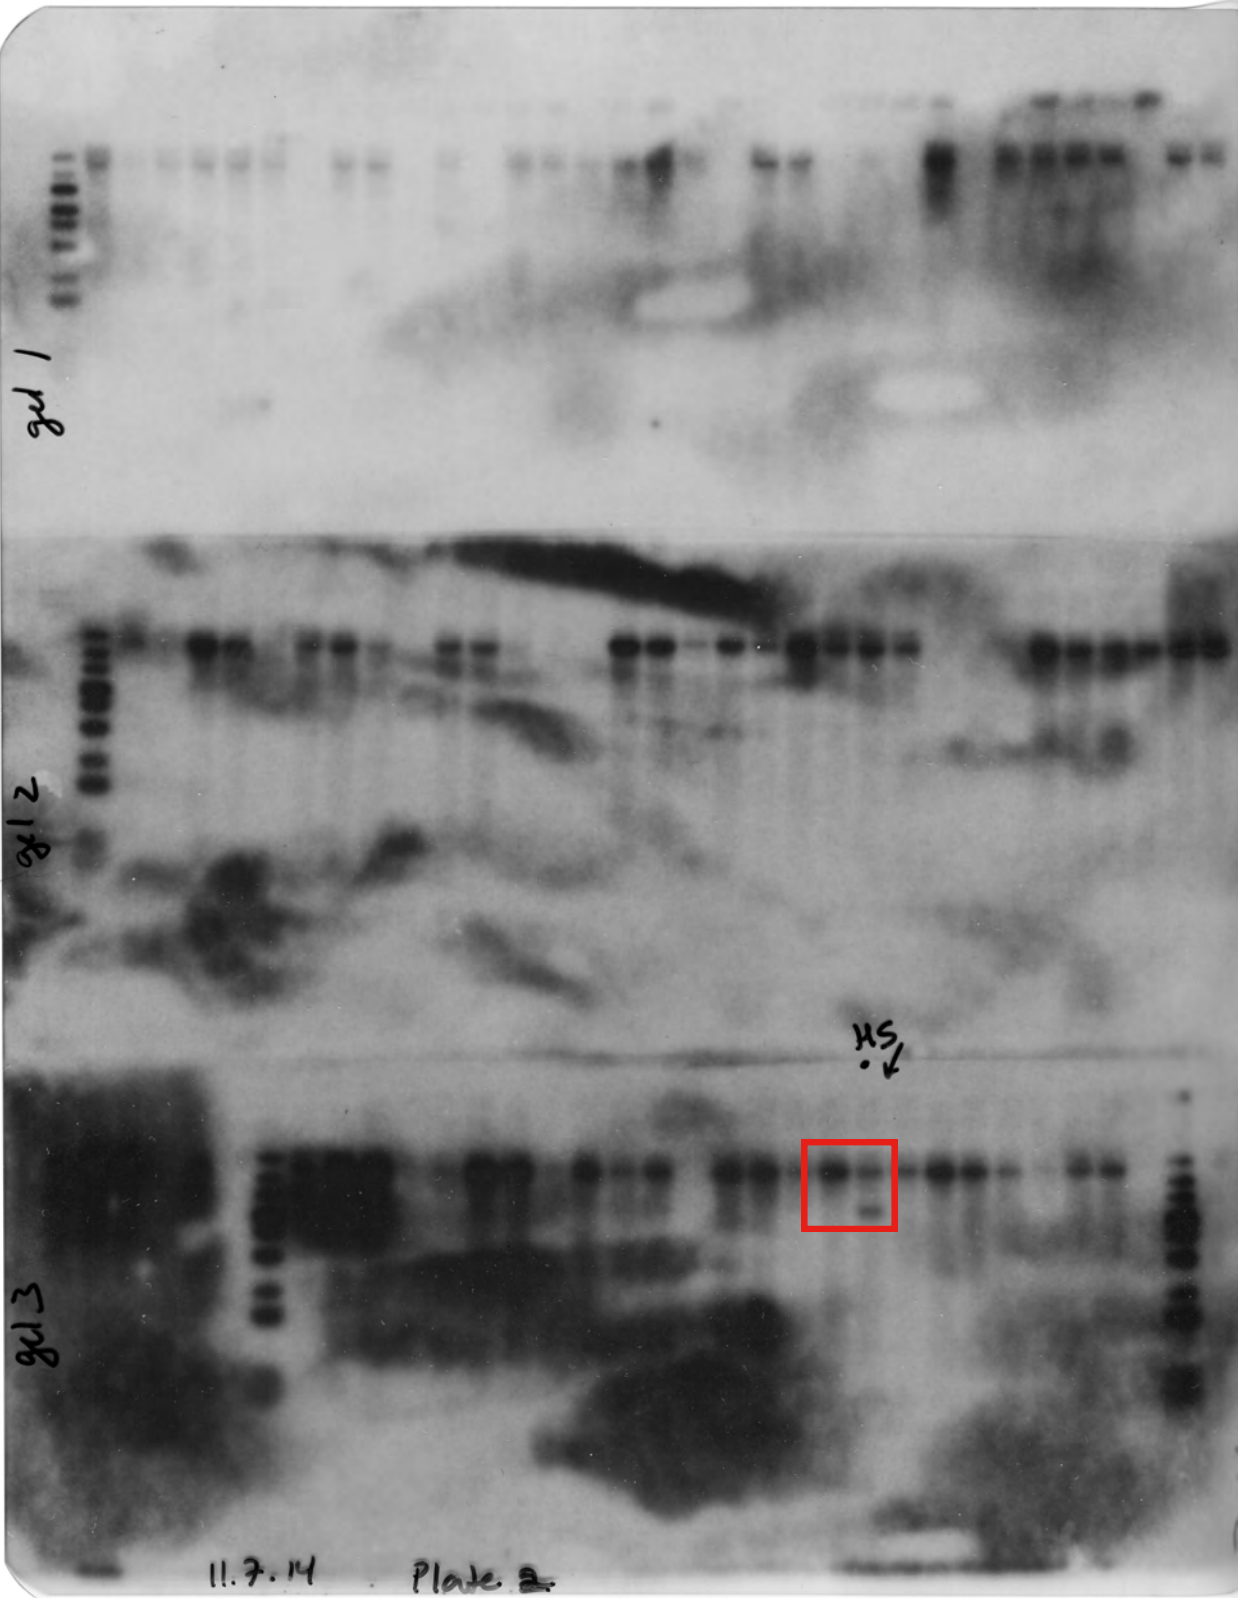

# Southern Blots

EDF. 2d lower

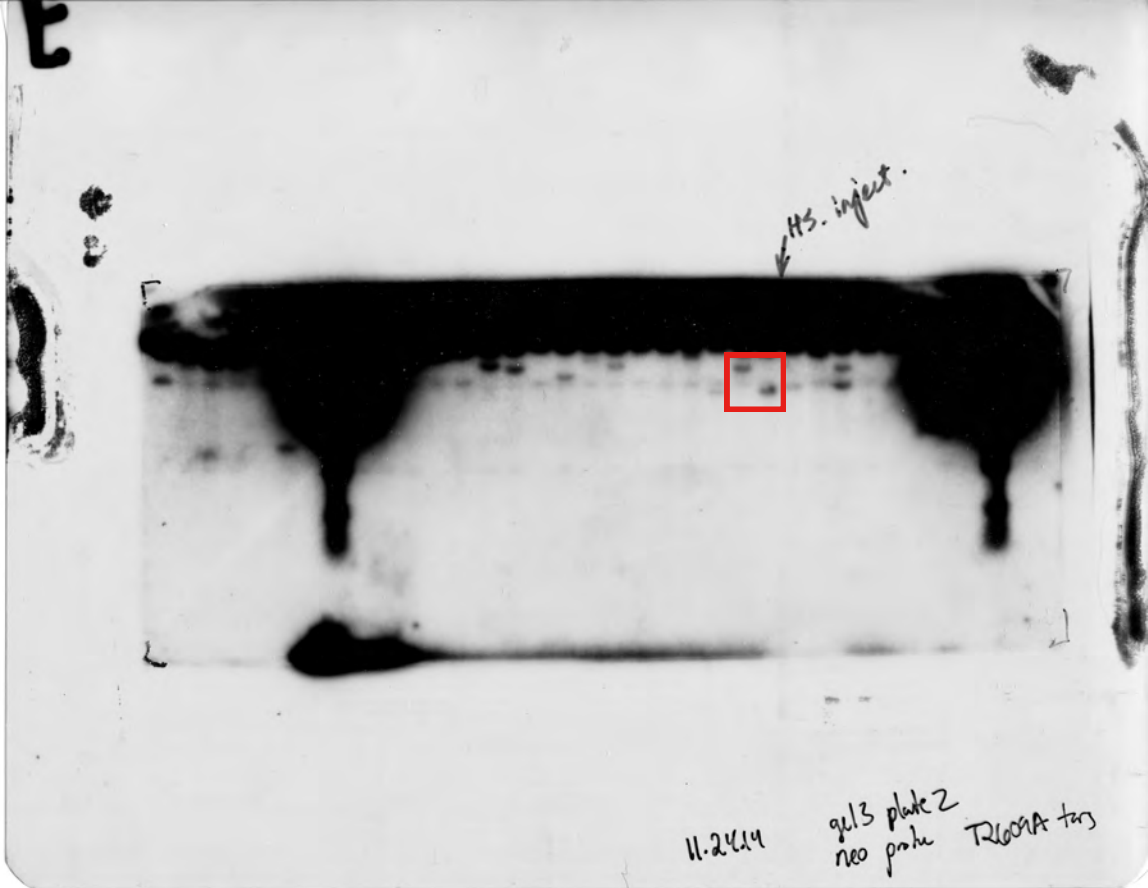

EDF. 4g

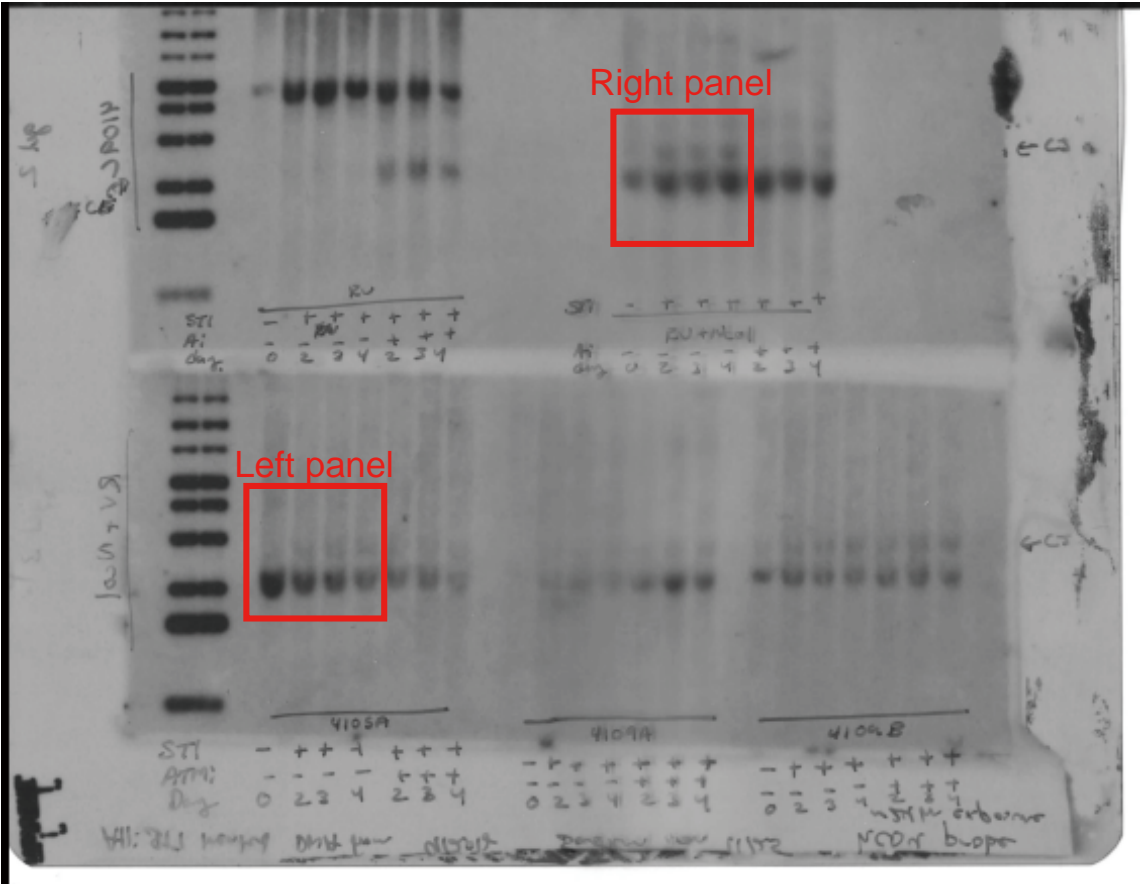



# EDF9c

DNA-PK holoenzyme (Promega)

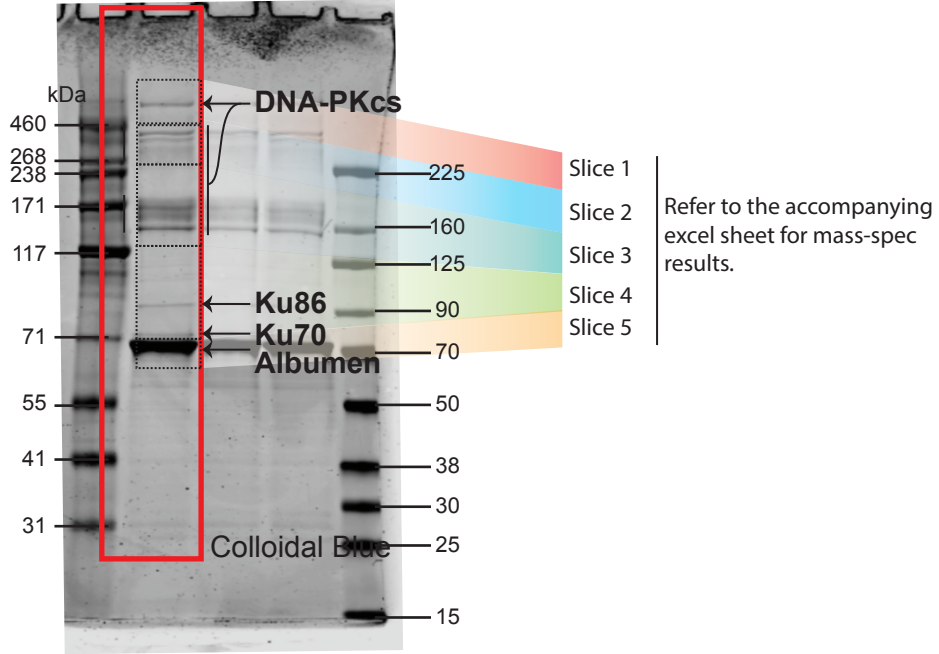

### EDF10a

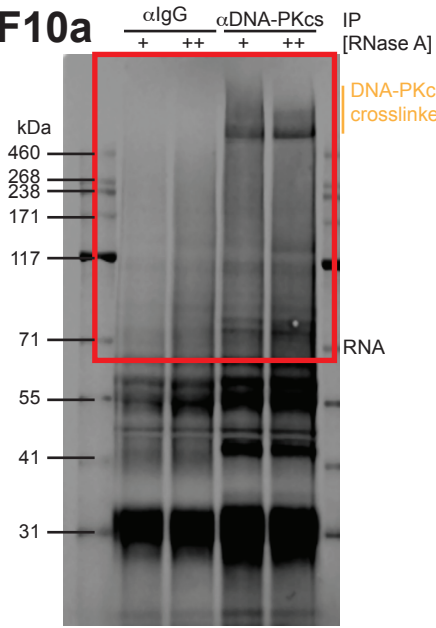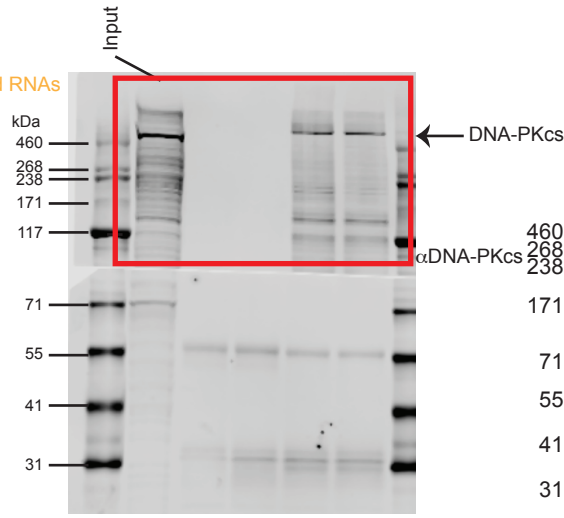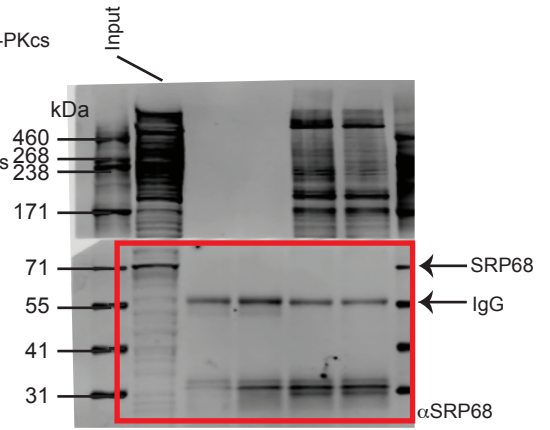

### EDF10b

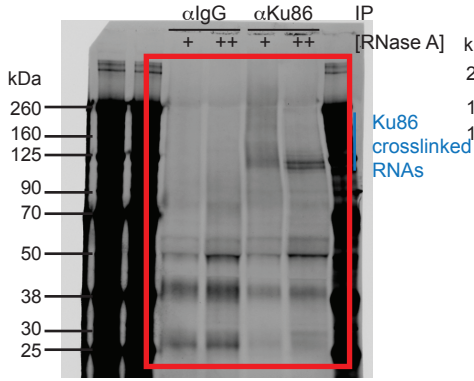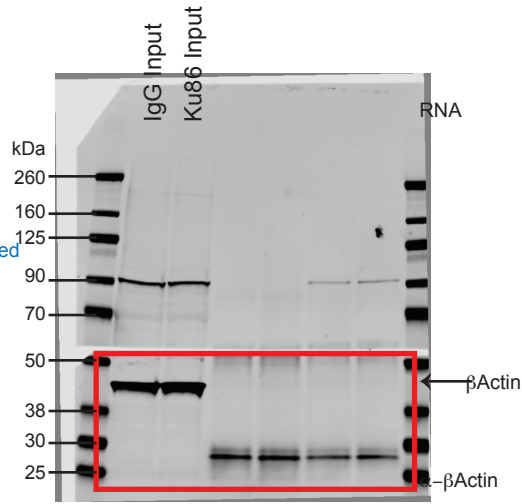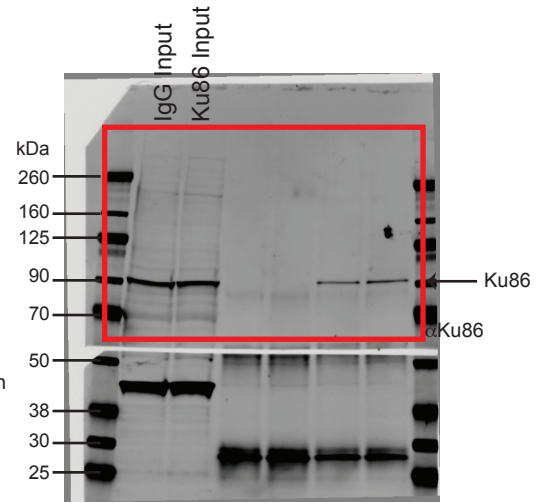

**Fig. 4d**

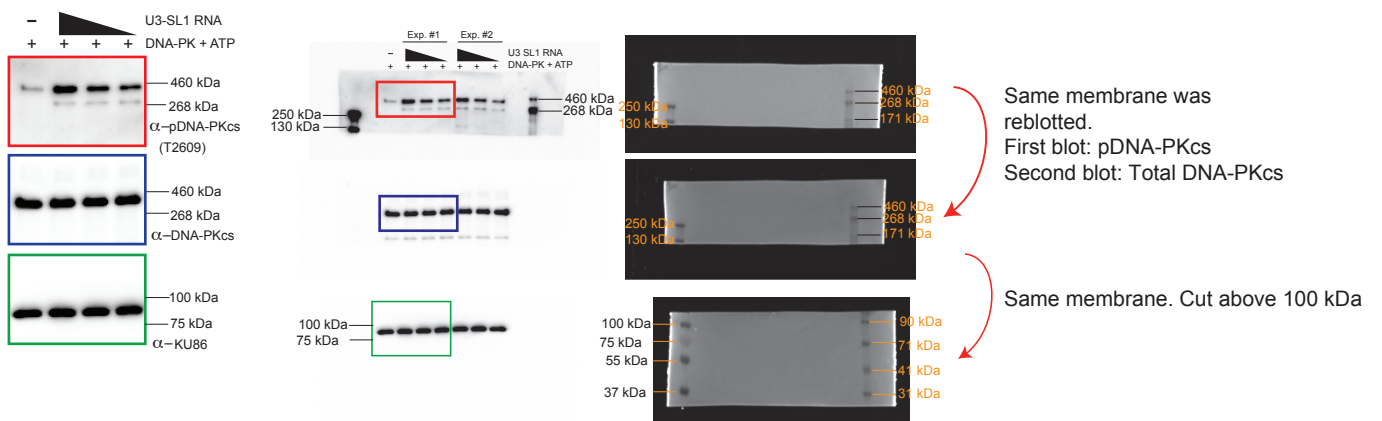

**Fig. 4e**

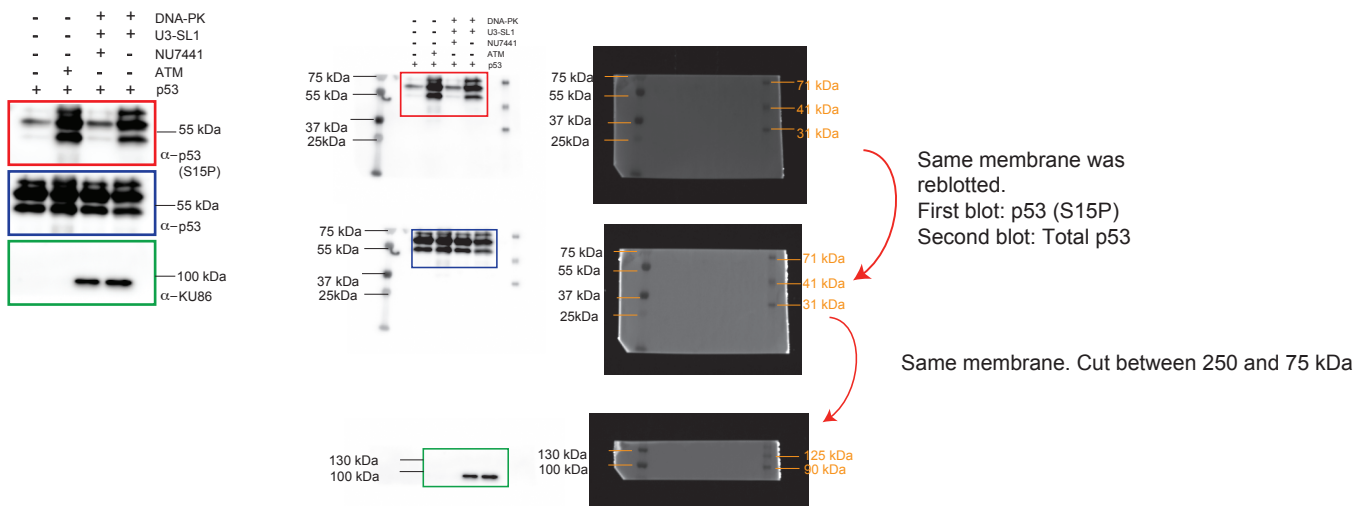

**EDF11k**

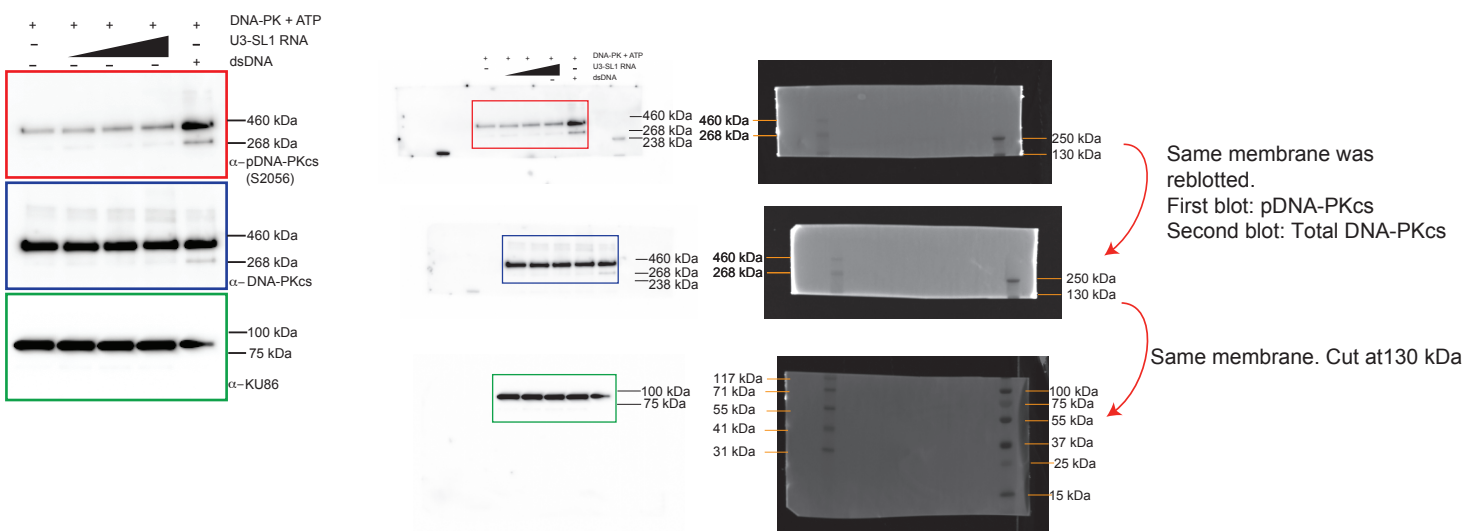

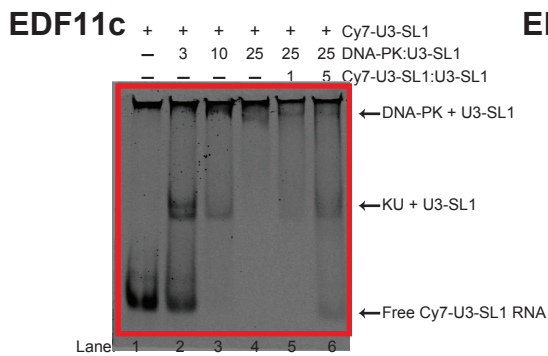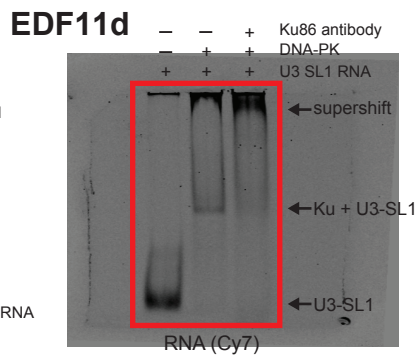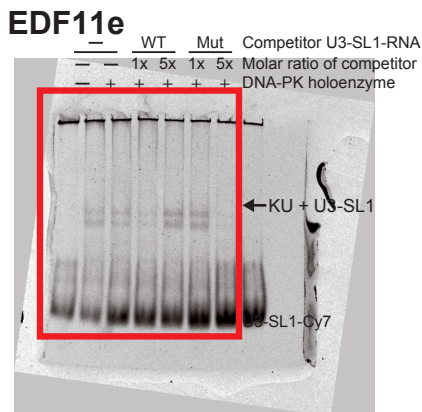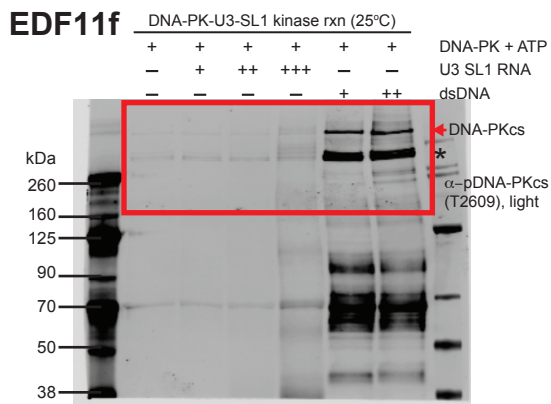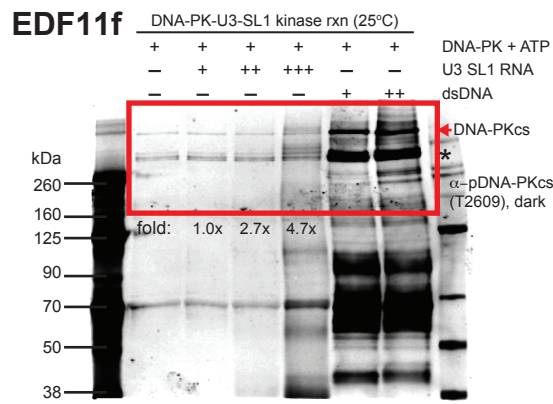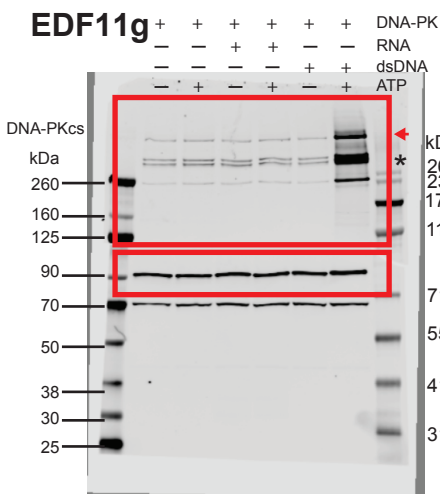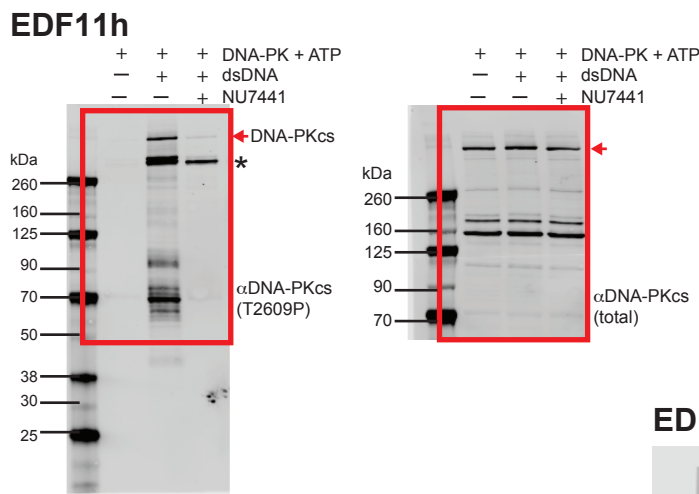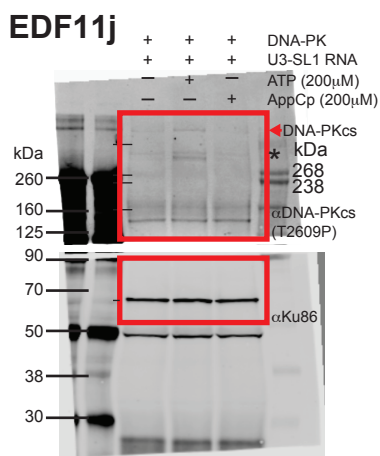

**EDF11k (see above)**

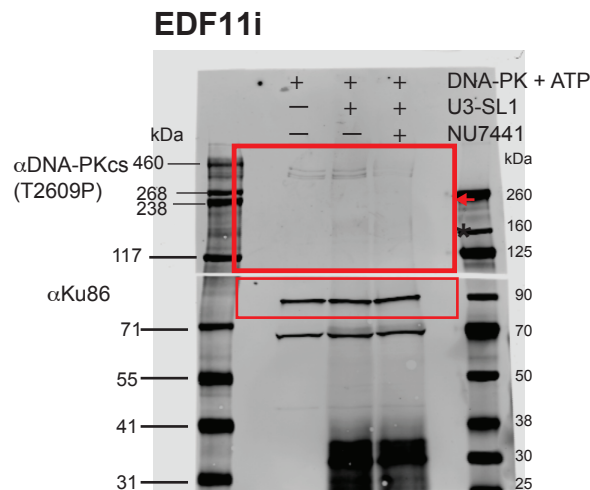

Supplement: NIHMS1960703-supplement-Supp_Figure_1.pdf [file NIHMS1960703-supplement-Supp_Figure_1.pdf]
