# Supplementary material
Source: PubMed Central journal article supplement (PMC10919329)
Supplement: NIHMS1960703-supplement-Stats_and_Reproducibility.pdf [file NIHMS1960703-supplement-Stats_and_Reproducibility.pdf]

## Statistics and Reproducibility

This file contains detailed information on the number of biological repeats, the counts of animal/cell lines used in each indicated figure panel as well as the statistical methods and the exact p value whenever possible. Note: when the  $p < 1.00 \times 10^{-10}$ , the GraphPad Prism software does not provide the exact p value.

### Figure 1.

**a**, *DNA-PKcs*<sup>KD/KD</sup>; *TP53*<sup>-/-</sup> (n=20), *DNA-PKcs*<sup>KD/KD</sup>; *TP53*<sup>+/-</sup> (n=38), *DNA-PKcs*<sup>-/-</sup>; *TP53*<sup>-/-</sup> (n=31), *Xrcc4*<sup>-/-</sup>; *TP53*<sup>-/-</sup> (n=21) and *TP53*<sup>-/-</sup> (n=56). Two-sided Mantel-Cox Log-rank test  $p = 1.00 \times 10^{-10}$  between *DNA-PKcs*<sup>KD/KD</sup>; *TP53*<sup>-/-</sup> and *DNA-PKcs*<sup>KD/KD</sup>; *TP53*<sup>+/-</sup>;  $p = 5.58 \times 10^{-4}$  between *DNA-PKcs*<sup>KD/KD</sup>; *TP53*<sup>-/-</sup> and *DNA-PKcs*<sup>-/-</sup>; *TP53*<sup>-/-</sup>;  $p = 1.01 \times 10^{-1}$  (n.s.) between *DNA-PKcs*<sup>-/-</sup>; *TP53*<sup>-/-</sup> and *Xrcc4*<sup>-/-</sup>; *TP53*<sup>-/-</sup>,  $p = 4.27 \times 10^{-5}$  between *DNA-PKcs*<sup>KD/KD</sup>; *TP53*<sup>+/-</sup> and *TP53*<sup>-/-</sup> and finally the  $p < 1.00 \times 10^{-10}$  when the survival curves of *DNA-PKcs*<sup>-/-</sup>; *TP53*<sup>-/-</sup>, *DNA-PKcs*<sup>KD/KD</sup>; *TP53*<sup>-/-</sup> mice or *Xrcc4*<sup>-/-</sup>; *TP53*<sup>-/-</sup> groups were compared with the *TP53*<sup>-/-</sup> group.

**c**. *DNA-PKcs*<sup>KD/KD</sup>; *TP53*<sup>-/-</sup> (n=8 myeloid, n=4 pro-B); *DNA-PKcs*<sup>-/-</sup>; *TP53*<sup>-/-</sup> (n=14 pro-B); *Xrcc4*<sup>-/-</sup>; *TP53*<sup>-/-</sup> (n=7 pro-B), *DNA-PKcs*<sup>KD/KD</sup>; *TP53*<sup>+/-</sup> (n=6 Thymic lymphoma, n=4 sarcoma). The p value was calculated using a two-sided unpaired Student's *t*-test. When the survival (days) were compared with the *DNA-PKcs*<sup>KD/KD</sup>; *TP53*<sup>-/-</sup> myeloid group,  $p = 4.15 \times 10^{-8}$  for *DNA-PKcs*<sup>KD/KD</sup>; *TP53*<sup>-/-</sup> pro-B cell lymphoma,  $p = 0.07 \times 10^{-8}$  for *DNA-PKcs*<sup>-/-</sup>; *TP53*<sup>-/-</sup> pro-B cell lymphoma, and  $p = 0.02 \times 10^{-8}$  for *Xrcc4*<sup>-/-</sup>; *TP53*<sup>-/-</sup> pro-B cell lymphoma. In comparison to the survival (days) of *DNA-PKcs*<sup>KD/KD</sup>; *TP53*<sup>-/-</sup> pro-B, the p-value for *DNA-PKcs*<sup>-/-</sup>; *TP53*<sup>-/-</sup> pro-B cell lymphoma is  $9.85 \times 10^{-2}$  (n.s.), for *Xrcc4*<sup>-/-</sup>; *TP53*<sup>-/-</sup> pro-B cell lymphoma is 0.51 (n.s.). Finally the p value between the survival (days) of *DNA-PKcs*<sup>-/-</sup>; *TP53*<sup>-/-</sup> pro-B and *Xrcc4*<sup>-/-</sup>; *TP53*<sup>-/-</sup> pro-B cell lymphoma is 0.14 (n.s.).

**d**, Histological analyses were performed independently on 3 mice for each genotype with similar results to the reached conclusion.

**e**, Histological analyses were independently repeated on n=9 *DNA-PKcs*<sup>+/+</sup>, n=9 *DNA-PKcs*<sup>5A/5A</sup>, n=4 *DNA-PKcs*<sup>5A/5A</sup>; *TP53*<sup>+/-</sup>, and n=3 *PKcs*<sup>5A/5A</sup>; *TP53*<sup>-/-</sup> mice with similar results.

### Figure 2.

**a**. *DNA-PKcs*<sup>5A/5A</sup> (n=21), *DNA-PKcs*<sup>5A/5A</sup>; *TP53*<sup>+/-</sup> (n=34), *DNA-PKcs*<sup>5A/5A</sup>; *TP53*<sup>-/-</sup> (n=11), *DNA-PKcs*<sup>5A/5A</sup>; *Ku70*<sup>-/-</sup> (n=9) and *Ku70*<sup>-/-</sup> (n=7). The p-value was obtained via a two-sided Mantel-Cox log-rank test. In comparison to the *DNA-PKcs*<sup>5A/5A</sup> group, p-value is  $< 0.01 \times 10^{-8}$  for *DNA-PKcs*<sup>5A/5A</sup>; *TP53*<sup>+/-</sup>,  $9.08 \times 10^{-7}$  for *DNA-PKcs*<sup>5A/5A</sup>; *TP53*<sup>-/-</sup>,  $9.46 \times 10^{-6}$  for *DNA-PKcs*<sup>5A/5A</sup>; *Ku70*<sup>-/-</sup>, and  $1.33 \times 10^{-5}$  for *Ku70*<sup>-/-</sup>.

**b and e**. *DNA-PKcs*<sup>+/+</sup> (n=22), *DNA-PKcs*<sup>5A/5A</sup> (n=11), *DNA-PKcs*<sup>5A/5A</sup>; *Ku70*<sup>-/-</sup> (n=3), *Ku70*<sup>-/-</sup> (n=3), and *DNA-PKcs*<sup>-/-</sup> (n=5). The p-value was obtained using a two-sided unpaired Student's *t*-test. For red blood cell counts (**panel b**) - in comparison to the *DNA-PKcs*<sup>+/+</sup> group,  $p < 0.01 \times 10^{-8}$  for the *DNA-PKcs*<sup>5A/5A</sup>,  $p = 0.18$  (n.s.) for *DNA-PKcs*<sup>5A/5A</sup>; *Ku70*<sup>-/-</sup>,  $p = 0.16$  (n.s.) for *Ku70*<sup>-/-</sup>, and  $p = 0.32$  (n.s.) for *DNA-PKcs*<sup>-/-</sup> groups. The p-value between the *DNA-PKcs*<sup>5A/5A</sup> group and the *DNA-PKcs*<sup>5A/5A</sup>; *Ku70*<sup>-/-</sup> group is  $3.04 \times 10^{-5}$ . For MCV (**panel e**) - in comparison to the *DNA-PKcs*<sup>+/+</sup> group,  $p = 1.32 \times 10^{-9}$  for the *DNA-PKcs*<sup>5A/5A</sup> group,  $p = 0.27$  (n.s.) for *DNA-PKcs*<sup>5A/5A</sup>; *Ku70*<sup>-/-</sup> group,  $p = 0.42$  (n.s.) for *Ku70*<sup>-/-</sup>, and  $p = 5.68 \times 10^{-2}$  for *DNA-PKcs*<sup>-/-</sup>.

**c and d.** The FACS plot and the dot plot represent the collective results from *DNA-PKcs*<sup>+/+</sup> (n=9), *DNA-PKcs*<sup>5A/5A</sup> (n=9), *PKcs*<sup>5A/5A</sup>; *Ku70*<sup>-/-</sup> (n=4), and *Ku70*<sup>-/-</sup> (n=5) mice. The p-value was calculated using a two-sided unpaired Student's *t*-test. In comparison to the *DNA-PKcs*<sup>5A/5A</sup> group, the p= 4.53x10<sup>-5</sup> for *DNA-PKcs*<sup>+/+</sup> and p=0.03 for *DNA-PKcs*<sup>5A/5A</sup>; *Ku70*<sup>-/-</sup>. In comparison to the *Ku70*<sup>-/-</sup>, the p= 0.36 (n.s.) for *DNA-PKcs*<sup>5A/5A</sup>; *Ku70*<sup>-/-</sup> and p= 0.10 (n.s.) for *DNA-PKcs*<sup>+/+</sup>.

**f and g.** *DNA-PKcs*<sup>+/+</sup> (n=10), *DNA-PKcs*<sup>5A/5A</sup> (n=9), *DNA-PKcs*<sup>5A/5A</sup>; *Ku70*<sup>-/-</sup> (n=3), *Ku70*<sup>-/-</sup> (n=3) and *DNA-PKcs*<sup>-/-</sup> (n=5). The p-value was calculated using a two-sided unpaired Student's *t*-test. **For S2%:** in comparison to *DNA-PKcs*<sup>+/+</sup> group, p= 6.05x10<sup>-4</sup> for *DNA-PKcs*<sup>5A/5A</sup>, p= 0.69x10<sup>-2</sup> for *DNA-PKcs*<sup>5A/5A</sup>; *Ku70*<sup>-/-</sup>, p=0.49 (n.s.) for *Ku70*<sup>-/-</sup>, and p= 0.60(n.s.) for *DNA-PKcs*<sup>-/-</sup>. **For S3%:** in comparison to *DNA-PKcs*<sup>+/+</sup> group, p= 6.87x10<sup>-8</sup> for *DNA-PKcs*<sup>5A/5A</sup>, p= 0.21(n.s.) for *DNA-PKcs*<sup>5A/5A</sup>; *Ku70*<sup>-/-</sup>, p=0.93(n.s.) for *Ku70*<sup>-/-</sup>, and p= 0.08 (n.s.) for *DNA-PKcs*<sup>-/-</sup>. **For S4%:** in comparison to *DNA-PKcs*<sup>+/+</sup> group, p= 9.08x10<sup>-6</sup> for *DNA-PKcs*<sup>5A/5A</sup>, p= 0.43 (n.s.) for *DNA-PKcs*<sup>5A/5A</sup>; *Ku70*<sup>-/-</sup>, p=0.13 (n.s.) for *Ku70*<sup>-/-</sup>, and p= 0.77 (n.s.) for *DNA-PKcs*<sup>-/-</sup>. There were no adjustments for multiple comparisons. Each group was analyzed independently, without assuming a consistent standard deviation (SD).

**h and i,** *DNA-PKcs*<sup>+/+</sup> (n=6) or *DNA-PKcs*<sup>+/-</sup> (n=5), *DNA-PKcs*<sup>5A/5A</sup> (n=8), *Ku70*<sup>-/-</sup> (n=3), and *DNA-PKcs*<sup>-/-</sup> (n=5). The p-values were calculated using a two-sided unpaired Student's *t*-test. **For S1-OP-Puro low%:** in comparison to *DNA-PKcs*<sup>+/+</sup> or *DNA-PKcs*<sup>+/-</sup> Ctrl group, p= 0.43x10<sup>-2</sup> for *DNA-PKcs*<sup>5A/5A</sup>, p= 0.06 for *Ku70*<sup>-/-</sup>, and p= 0.73 for *DNA-PKcs*<sup>-/-</sup>. **For S2-OP-Puro low%:** in comparison to *DNA-PKcs*<sup>+/+</sup> or *DNA-PKcs*<sup>+/-</sup> Ctrl group, p= 0.60x10<sup>-3</sup> for *DNA-PKcs*<sup>5A/5A</sup>, p= 0.42 for *Ku70*<sup>-/-</sup>, and p= 0.79 for *DNA-PKcs*<sup>-/-</sup>. **For S3-OP-Puro low%:** in comparison to *DNA-PKcs*<sup>+/+</sup> or *DNA-PKcs*<sup>+/-</sup> Ctrl group, p= 0.02 for *DNA-PKcs*<sup>5A/5A</sup>, p= 0.56 for *Ku70*<sup>-/-</sup>, p= 0.53 for *DNA-PKcs*<sup>-/-</sup>. There were no adjustments for multiple comparisons. Each group was analyzed independently, without assuming a consistent SD.

**j.** The data represents 3 biologically independent samples for each genotype. The p-values were calculated using a two-sided paired Student's *t*-test. The p-value is 1.54 x10<sup>-7</sup> between *DNA-PKcs*<sup>+/+</sup> with or without OP-Puro. The p-value is 0.90 x10<sup>-2</sup> between *DNA-PKcs*<sup>+/+</sup> +/- NU7441 (DNA-PK inhibitor), is 0.89 (n.s.) between *DNA-PKcs*<sup>-/-</sup> +/- NU7441, and p= 0.02 between *Ku70*<sup>-/-</sup> +/- NU7441. Finally, the p-value is 0.03 between *DNA-PKcs*<sup>+/+</sup> and *DNA-PKcs*<sup>-/-</sup>, and is 0.02 between *DNA-PKcs*<sup>+/+</sup> and *Ku70*<sup>-/-</sup>.

### Figure 3.

**c,** The experiments were independently repeated 4 times. One additional repeat was shown in Extended Data Figure 8f.

**d,** The experiments were independently repeated 3 times.

### Ext. Data Figure 1.

**a**, All the *DNA-PKcs*<sup>KD/KD</sup>;*Tp53*<sup>-/-</sup> mice (n=4 at the time of the first submission) that succumbed to pro-B cell lymphomas show similar accumulation of B220<sup>+</sup>IgM<sup>-</sup> proB cells in both bone marrow and spleen. One representative flow cytometry plot is shown.

**b**, Experiments were repeated on 3 mice for each genotype. The p-value for two-sided unpaired Student's *t*-test is 0.17 x10<sup>-2</sup> for the number of megakaryocytes per field, and 0.74 x10<sup>-3</sup> for the number of megakaryocytes with hyperchromatic/pyknotic nuclei per field in spleen between *DNA-PKcs*<sup>KD/KD</sup>;*Tp53*<sup>-/-</sup> and *DNA-PKcs*<sup>+/+</sup>;*Tp53*<sup>-/-</sup> mice.

**c**, A subset of *DNA-PKcs*<sup>KD/KD</sup>;*Tp53*<sup>-/-</sup> mice (3 out of the 8 at the time of the first submission) succumbed to myeloid disease have an accumulation of cKit<sup>+</sup>CD11b<sup>+</sup>GR1<sup>+</sup> cells in the bone marrow. The frequency of cKit<sup>+</sup> fraction among CD11b<sup>+</sup>GR1<sup>+</sup> cells varies from 10-20%. One representative plot was shown.

### Ext. Data Figure 2.

**d**, Over 5 correctly targeted clones were identified by Southern Blotting with a 5' probe, and subsequently confirmed with a 3' probe and Sanger sequencing. One representative Southern blot of a positive clone is shown.

**e and f**, *DNA-PKcs*<sup>+/+</sup> (n=5) and *DNA-PKcs*<sup>PQR/PQR</sup> (n=4). A two-sided unpaired Student's *t*-test was used to calculate the p-value. The p=0.27 for RBC counts (**e**) and p= 0.99 for PLT counts (**f**) between *DNA-PKcs*<sup>+/+</sup> and *DNA-PKcs*<sup>PQR/PQR</sup> mice.

**g**, *DNA-PKcs*<sup>+/+</sup> (n=22), *DNA-PKcs*<sup>5A/5A</sup>(n=11) and *DNA-PKcs*<sup>-/-</sup> (n=5). A two-sided unpaired Student's *t*-test was used to calculate the p-value. In comparison to the *DNA-PKcs*<sup>+/+</sup> group, the p-value is 2.72x10<sup>-7</sup> for *DNA-PKcs*<sup>5A/5A</sup>, p=0.06 for *DNA-PKcs*<sup>-/-</sup>.

**h and i**, The pale kidney and liver were observed in every *DNA-PKcs*<sup>5A/5A</sup> mice (n=11 or more) analyzed. One representative picture is shown.

### Ext. Data Figure 3.

**a and b**, Representative flow cytometry panels and statistic summary from independent analyses performed on n=9 *DNA-PKcs*<sup>+/+</sup>, n=9 *DNA-PKcs*<sup>5A/5A</sup>, n=4 *DNA-PKcs*<sup>5A/5A</sup>;*Ku70*<sup>-/-</sup>, and n=5 *Ku70*<sup>-/-</sup> mice. A two-sided unpaired Student's *t*-test was used to calculate the p-value. When compared to the Lin<sup>-</sup>Scal<sup>-</sup>cKit<sup>+</sup> cells frequency in the *DNA-PKcs*<sup>+/+</sup> group, the p-value is 1.67x10<sup>-5</sup> for *DNA-PKcs*<sup>5A/5A</sup>, 0.03 for *DNA-PKcs*<sup>5A/5A</sup>;*Ku70*<sup>-/-</sup>, and 0.04 for *Ku70*<sup>-/-</sup>.

**c and d**, The representative flow cytometry analyses and the summary were collected from n=3 *DNA-PKcs*<sup>+/+</sup>, n=6 *DNA-PKcs*<sup>+/5A</sup>, n=4 *DNA-PKcs*<sup>5A/5A</sup>, and n=4 *DNA-PKcs*<sup>KD/KD</sup> embryos. A two-sided unpaired Student's *t*-test was used to compare the frequency of Lin<sup>-</sup>Scal<sup>+</sup>cKit<sup>+</sup> cells in the fetal liver. In comparison to the *DNA-PKcs*<sup>+/+</sup> controls, the p-value is 0.19 for *DNA-PKcs*<sup>+/5A</sup>, 6.72x10<sup>-5</sup> for *DNA-PKcs*<sup>5A/5A</sup>, and 6.43x10<sup>-6</sup> for *DNA-PKcs*<sup>KD/KD</sup>.

**e**, This gating strategy was used in all experiments, including the OP-Puro data shown in Extended Data Figure 7d.

#### Ext. Data Figure 4.

**a and b**, The flow cytometry plots (a) and the summary (b) were collected from n=4 mice for each genotype. A two-sided unpaired Student's *t*-test was used to calculate the p-value. In comparison to *DNA-PKcs*<sup>+/+</sup>, the p= 3.80x10<sup>-6</sup> for *DNA-PKcs*<sup>5A/5A</sup>, p= 0.33 for *DNA-PKcs*<sup>5A/5A</sup>;*TP53*<sup>-/-</sup>, and p= 1.28x10<sup>-6</sup> for *DNA-PKcs*<sup>-/-</sup>;*TP53*<sup>-/-</sup>. In addition, p= 7.85x10<sup>-6</sup> between *DNA-PKcs*<sup>5A/5A</sup> and *DNA-PKcs*<sup>5A/5A</sup>;*TP53*<sup>-/-</sup> groups

**c**, *DNA-PKcs*<sup>+/+</sup>(n=22), *DNA-PKcs*<sup>5A/5A</sup>(n=11), *DNA-PKcs*<sup>5A/5A</sup> ; *TP53*<sup>+/-</sup> (n= 4), *DNA-PKcs*<sup>5A/5A</sup>;*TP53*<sup>-/-</sup> (n= 3), *TP53*<sup>-/-</sup>(n= 3), and *DNA-PKcs*<sup>-/-</sup>(n=5). A two-sided unpaired Student's *t*-test was used to calculate the p-value. The p<0.01x10<sup>-8</sup> between *DNA-PKcs*<sup>+/+</sup> and *DNA-PKcs*<sup>5A/5A</sup>, p= 0.01 between *DNA-PKcs*<sup>+/+</sup> and *DNA-PKcs*<sup>5A/5A</sup>;*TP53*<sup>+/-</sup>, p= 0.65 between *DNA-PKcs*<sup>+/+</sup> and *DNA-PKcs*<sup>5A/5A</sup>;*TP53*<sup>-/-</sup>, p= 0.93 between *DNA-PKcs*<sup>+/+</sup> and *TP53*<sup>+/-</sup>, and p= 0.32 between *DNA-PKcs*<sup>+/+</sup> and *DNA-PKcs*<sup>-/-</sup>.

**d, e**, *DNA-PKcs*<sup>+/+</sup>(n=22), *DNA-PKcs*<sup>5A/5A</sup>(n=6), *DNA-PKcs*<sup>5A/5A</sup>;*Ku70*<sup>-/-</sup> (n= 3), *DNA-PKcs*<sup>-/-</sup> (n= 5), *Ku70*<sup>-/-</sup> (n= 3), *DNA-PKcs*<sup>5A/5A</sup>;*TP53*<sup>+/-</sup> (n= 4), *DNA-PKcs*<sup>5A/5A</sup>;*TP53*<sup>-/-</sup> (n= 3), and *TP53*<sup>+/-</sup>(n=3). A two-sided unpaired Student's *t*-test was used to calculate the p-value. **For lymphocyte counts (d)**, in comparison to the *DNA-PKcs*<sup>+/+</sup> group, the p-values are 2.15x10<sup>-5</sup> for *DNA-PKcs*<sup>5A/5A</sup>, 0.08x10<sup>-2</sup> for *DNA-PKcs*<sup>5A/5A</sup>;*Ku70*<sup>-/-</sup>, 0.12x10<sup>-2</sup> for *Ku70*<sup>-/-</sup>, 0.14x10<sup>-2</sup> for *DNA-PKcs*<sup>5A/5A</sup>;*TP53*<sup>+/-</sup>, 0.096 for *DNA-PKcs*<sup>5A/5A</sup>;*TP53*<sup>-/-</sup>, 0.88 for *TP53*<sup>+/-</sup>, and finally 2.05x10<sup>-4</sup> for *DNA-PKcs*<sup>-/-</sup>. **For neutrophil counts (e)**, in comparison to the *DNA-PKcs*<sup>+/+</sup> group, the p-values are 1.20x10<sup>-3</sup> for *DNA-PKcs*<sup>5A/5A</sup>, 0.10 for *DNA-PKcs*<sup>5A/5A</sup>;*Ku70*<sup>-/-</sup>, 0.85 for *Ku70*<sup>-/-</sup>, p= 0.055 for *DNA-PKcs*<sup>5A/5A</sup>;*TP53*<sup>+/-</sup>, p= 0.73 for *DNA-PKcs*<sup>5A/5A</sup>;*TP53*<sup>-/-</sup>, p= 0.82 for *TP53*<sup>+/-</sup>, and p= 0.55 for *DNA-PKcs*<sup>-/-</sup>.

**g and h**, Four independent v-abl transformed cell lines with single integration of pMX-INV V(D)J recombination substrates were generated and analyzed. The results were all consistent. A representative result from a *DNA-PKcs*<sup>5A/5A</sup> and a *DNA-PKcs*<sup>+/+</sup> lines are shown.

**i**, *DNA-PKcs*<sup>+/+</sup>(n=5), *DNA-PKcs*<sup>5A/5A</sup>;*TP53*<sup>+/-</sup> (n=3) and *DNA-PKcs*<sup>-/-</sup>;*TP53*<sup>+/-</sup>(n=3) Left: A two-sided unpaired Student's *t*-test was used to calculate the p-value. The p= 0.56 (n.s.) between *DNA-PKcs*<sup>+/+</sup> and *DNA-PKcs*<sup>5A/5A</sup>;*TP53*<sup>+/-</sup>, and p= 4.29x10<sup>-3</sup> between *DNA-PKcs*<sup>+/+</sup> and *DNA-PKcs*<sup>-/-</sup>;*TP53*<sup>+/-</sup>, right: p= 0.09 between *DNA-PKcs*<sup>+/+</sup> and *DNA-PKcs*<sup>5A/5A</sup>;*TP53*<sup>+/-</sup>, and p= 2.43x10<sup>-3</sup> between *DNA-PKcs*<sup>+/+</sup> and *DNA-PKcs*<sup>-/-</sup>;*TP53*<sup>+/-</sup>.

#### Ext. Data Figure 5.

**a,b**. The experiments were repeated 4 times with independently derived MEFs (2 *DNA-PKcs*<sup>5A/5A</sup> MEFs line for each repeat). Each experiment was plated in triplicates or quadruplicates for each treatment.

**c, d**. The experiments were independently repeated 2 times in triplicates for each line and two independent *DNA-PKcs*<sup>5A/5A</sup> lines per experiment were used. The representative results and quantification for one experiment (n=3 for *DNA-PKcs*<sup>+/+</sup> and n=6 for *DNA-PKcs*<sup>5A/5A</sup>) are shown. A two-sided unpaired Student's *t*-test was used to calculate p-value. p= 0.17 (n.s., 250nM), p= 0.27 (n.s., 500nM) and p= 0.69 (n.s., 1000nM) between *DNA-PKcs*<sup>+/+</sup> and *DNA-PKcs*<sup>5A/5A</sup>.

**e**, The experiments were independently repeated 2 times with duplication for each line and two independently derived *DNA-PKcs*<sup>+/+</sup> and *DNA-PKcs*<sup>5A/5A</sup> ESCs per experiment, which made n=4

biologically independent experiments. A two-sided unpaired Student's *t*-test was used to calculate the p-value at each IR dose independently from each other. No technical replicates were included.

**f**, The experiments were independently repeated 2 times in triplicates for each line. The specific experiments shown include independently derived primary MEFs from *DNA-PKcs*<sup>+/+</sup> (n=2), *DNA-PKcs*<sup>-/-</sup> (n=1), and *DNA-PKcs*<sup>5A/5A</sup> (n=3).

**g**, The experiments were independently repeated 3 times using independently derived primary MEFs. One representative FACS from each type is shown. Experiments were repeated n=3 times for *DNA-PKcs*<sup>+/+</sup>, n=4 times for *DNA-PKcs*<sup>5A/5A</sup>, n=2 times for *DNA-PKcs*<sup>5A/5A</sup>; *Tp53*<sup>-/-</sup> and n=2 times for *DNA-PKcs*<sup>-/-</sup> yielding similar results.

### Ext. Data Figure 6.

**a, b** The experiments were independently repeated 3 times with two independently derived ESC for each genotype and plated in triplicates. Similar results were obtained. Randomly selected colonies were measured *DNA-PKcs*<sup>+/+</sup> (n=9), *DNA-PKcs*<sup>5A/5A</sup> (n=11) and *DNA-PKcs*<sup>5A/5A</sup>; *Ku80*<sup>-/-</sup> (n=15) A two-sided unpaired Student's *t*-test was used to calculate p-value. The p= 0.02 between *DNA-PKcs*<sup>+/+</sup> and *DNA-PKcs*<sup>5A/5A</sup> and p= 0.01 between *DNA-PKcs*<sup>5A/5A</sup> and *DNA-PKcs*<sup>5A/5A</sup>; *Ku80*<sup>-/-</sup>.

**c**, A total of n=4 independently derive ESCs of each genotype were analyzed. The representative panel shows two independently derived ESCs for each genotype.

**d, e, and f**, Telomere instability was measured in n=4 independent derived MEF lines for each genotype. A two-sided unpaired Student's *t*-test was used: p= 0.04 between *DNA-PKcs*<sup>+/+</sup> and *DNA-PKcs*<sup>5A/5A</sup>, p= 2.20x10<sup>-3</sup> between *DNA-PKcs*<sup>+/+</sup> and *DNA-PKcs*<sup>-/-</sup>, and p= 0.28 (n.s.) between *DNA-PKcs*<sup>5A/5A</sup> and *DNA-PKcs*<sup>-/-</sup>. The raw data were included in panel f.

**g**, The RBC size were independently measured in n=10 *DNA-PKcs*<sup>+/+</sup> and n=5 *DNA-PKcs*<sup>-/-</sup> mice. Similar results were obtained.

**h**, The OP-Puro levels in erythroblasts were measured in n=6 *DNA-PKcs*<sup>+/+</sup>, n=3 *Ku70*<sup>-/-</sup> and n=5 *DNA-PKcs*<sup>-/-</sup> mice with similar results obtained in each experiment. One representative set is shown.

### Ext. Data Figure 7.

**a**, *DNA-PKcs*<sup>+/+</sup> (n=22), *DNA-PKcs*<sup>5A/5A</sup> (n=11), *DNA-PKcs*<sup>5A/5A</sup>; *Tp53*<sup>+/-</sup> (n= 4), *DNA-PKcs*<sup>5A/5A</sup>; *Tp53*<sup>-/-</sup> (n= 3) and *Tp53*<sup>-/-</sup> (n= 3). A two-sided unpaired Student's *t*-test was used to calculate the p value. The p= 1.32x10<sup>-8</sup> between *DNA-PKcs*<sup>+/+</sup> and *DNA-PKcs*<sup>5A/5A</sup>, p= 0.10 between *DNA-PKcs*<sup>5A/5A</sup> and *DNA-PKcs*<sup>5A/5A</sup>; *Tp53*<sup>+/-</sup>, and p= 0.003 between *DNA-PKcs*<sup>5A/5A</sup> and *DNA-PKcs*<sup>5A/5A</sup>; *Tp53*<sup>-/-</sup>.

**b**, *DNA-PKcs*<sup>+/+</sup> (n=5) and *DNA-PKcs*<sup>5A/5A</sup> (n=4) fetal livers. A two-sided unpaired Student's *t*-test calculated p-value between *DNA-PKcs*<sup>+/+</sup> and *DNA-PKcs*<sup>5A/5A</sup> is 0.71x10<sup>-2</sup> for S1, 0.02 for S2 and 0.01 for S3.

**c**, n=8 mice for each genotype. A two-sided unpaired multi Student's *t*-test calculated p= 7.02x10<sup>-5</sup> between *DNA-PKcs*<sup>+/+</sup> and *DNA-PKcs*<sup>5A/5A</sup>.

**d**, Data collected from n=4 independent *DNA-PKcs*<sup>+/+</sup> mice were used to generate the plot. The high OP-puro levels in the erythroblast lineage were consistent in all animal tested. The means and standard errors were marked on the plot.

**e, f**, *DNA-PKcs*<sup>+/+</sup> (n=6) and *DNA-PKcs*<sup>5A/5A</sup> (n=8) fetal livers. A two-sided unpaired Student's *t*-test was used to calculate the p-values between *DNA-PKcs*<sup>+/+</sup> and *DNA-PKcs*<sup>5A/5A</sup> is 2.68x10<sup>-2</sup> for S1, 5.63x10<sup>-3</sup> for S2 and 6.20 x10<sup>-3</sup> for S3.

**g**, Control (*DNA-PKcs*<sup>+/+</sup> or *DNA-PKcs*<sup>+5A</sup>, n=5) and *DNA-PKcs*<sup>5A/5A</sup>; *Tp53*<sup>+/-</sup> (n=3). A two-sided unpaired Student's *t*-test was used to calculate the p-values between *DNA-PKcs*<sup>+/+</sup> and *DNA-PKcs*<sup>5A/5A</sup> are 7.26x10<sup>-3</sup> for S1 and 2.18x10<sup>-4</sup> for S2.

**h**, The experiments were performed n=4 times independently. The relative OP-Puro levels of each line were normalized to the OP-Puro levels of the WT (*DNA-PKcs*<sup>+/+</sup>) controls measured at the same time. The results from all four experiments were plotted together. A two-sided unpaired Student's *t*-test was used to calculate the p-values: p=6.76x10<sup>-7</sup> between *DNA-PKcs*<sup>+/+</sup> and *DNA-PKcs*<sup>3A/3A</sup> and p= 2.84 x10<sup>-2</sup> between *DNA-PKcs*<sup>+/+</sup> and *DNA-PKcs*<sup>KD/KD</sup>.

**i**, The experiments were performed 3 times independently and plotted together. The relative OP-Puro levels of ATM inhibitor treated lines were presented as a fraction of the OP-Puro levels in the DMSO treated sample measured at the same time. The results from the n=3 independent experiments were plotted together. A two-sided unpaired Student's *t*-test was used to calculate the p-value: p=0.38 (n.s.) between DMSO and ATMi.
